# Supplementary material
Source: PubMed Central journal article supplement (PMC4911744)
Supplement: MCB.00152-16_zmb999101253so1.pdf [file MCB.00152-16_zmb999101253so1.pdf]

**Supplemental Information:**

**Non-coding transcription is a driving force of nucleosome instability in *spt16*  
mutant cells**

Jianxun Feng<sup>#1,4</sup>, Haiyun Gan<sup>#2</sup>, Matthew L. Eaton<sup>3</sup>, Hui Zhou<sup>2</sup>, Shuqi Li<sup>4</sup>, David M. MacAlpine<sup>3</sup>, and Zhiguo Zhang<sup>\*2</sup> and Qing Li<sup>\*1,4</sup>

<sup>1</sup>State Key Laboratory of Protein and Plant Gene Research, School of Life Sciences and Peking-Tsinghua Center for Life Sciences

Peking University

Beijing, China 100871

<sup>2</sup>Department of Biochemistry and Molecular Biology

Mayo Clinic College of Medicine

200 First Street SW

Rochester, MN 55905

<sup>3</sup>Department of Pharmacology and Cancer Biology

Duke University Medical Center,

Durham, North Carolina 27710

<sup>4</sup>Academy for Advanced Interdisciplinary Studies, Peking University

<sup>#</sup>These authors contributed equally to this work

<sup>\*</sup>Corresponding author: Zhiguo Zhang (Zhang.Zhiguo@mayo.edu) and Qing Li (li.qing@pku.edu.cn)

Phone: 507-538-6074, 86-10-62752516 Fax: 507-284-9759

Running title: A vicious cycle of cryptic transcription and nucleosome instability

## Supplemental Figures

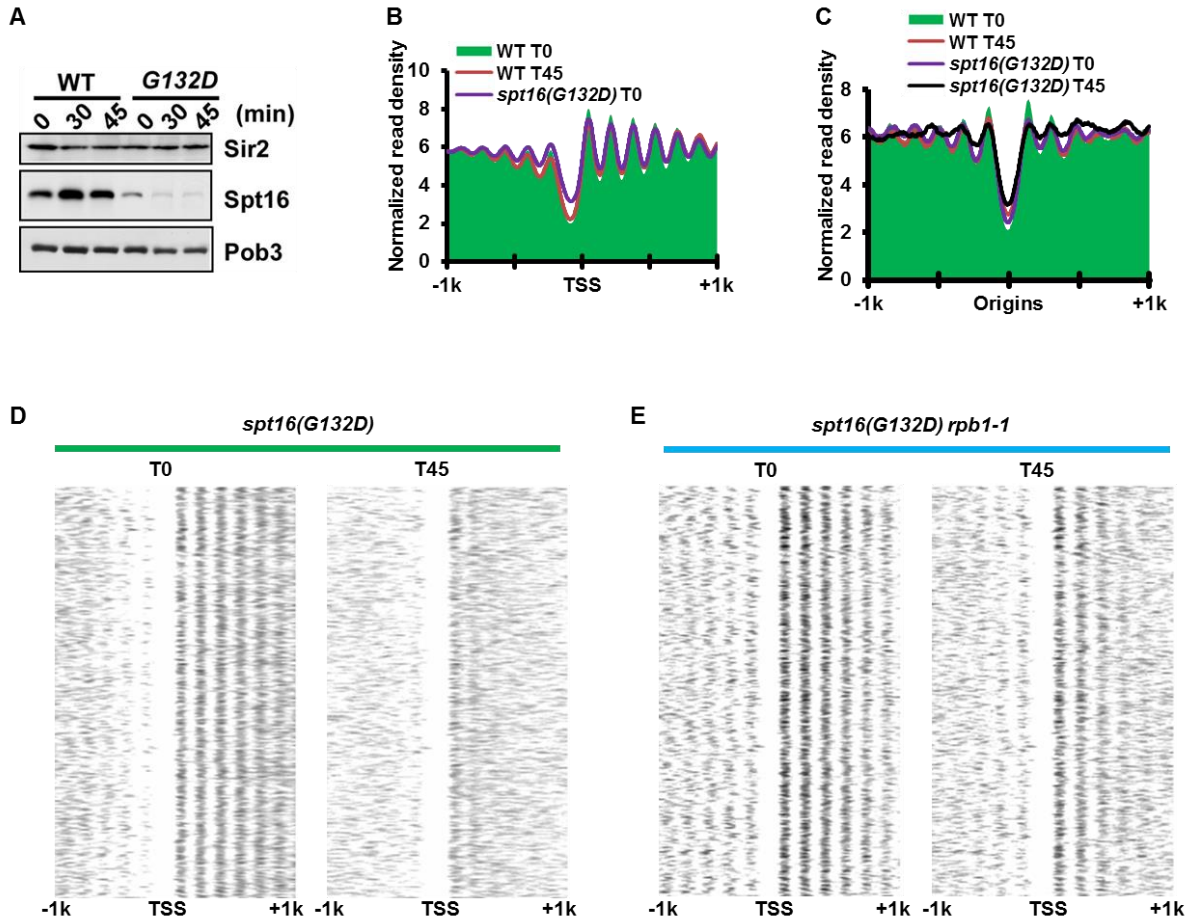

**FIG S1. Inactivation of Spt16 results in global nucleosome changes.** (A) Spt16 is depleted in *spt16 (G132D)*, but not in wild type cells at 37°C. WT and *spt16 (G132D)* cells were arrested at 25°C (0) and shifted to 37 °C for 30 min or 45 min. Whole cell extracts were prepared for Western blot analysis of Spt16, Pob3 and Sir2 (loading control). (B) The average nucleosome organization around the transcription start sites (TSS) in wild type (WT) cells at 25°C (T0) and at 37°C for 45 min (T45) and *spt16 (G132D)* at 37°C for 0 min (T0) were shown. Cells were arrested to G1 phase (T0) and then shift to 37°C for 45 min for nucleosome mapping using MNase-seq. We performed nucleosome mapping at G1 to avoid complication of cell cycle on nucleosomal changes.

(C) Inactivation of *spt16* results in global loss of nucleosomes at DNA replication origins. The nucleosome mapping was performed as (B) and DNA replication origins dataset was from (1). (D-E) Heat map of nucleosome occupancy at TSS sites in *spt16* (*G132D*) mutant cells (D) and *spt16* (*G132D*) *rpb1-1* mutant cells (E) at 25°C (T0) and at 37°C for 45 min (T45) were shown. Each row represents one ORF. A 4bp window was used to scan the reads density of MNase-seq from 1Kb downstream to 1Kb upstream of TSS. Dark color represents regions with organized nucleosomes.

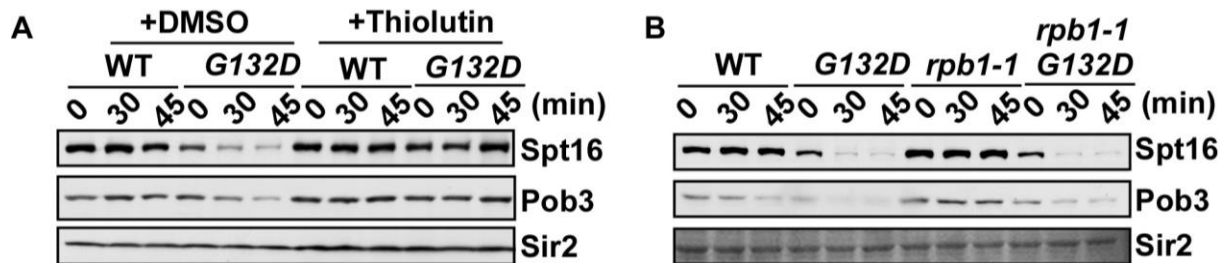

**FIG S2. The drug thiolutin and the *rpb1-1* mutant have different effect on Spt16 depletion.** (A) Thiolutin inhibits the depletion of Spt16 (*G132D*) proteins at non-permissive temperature compared to mock treated cells. Wild type (WT) and *spt16* (*G132D*) mutant cells were synchronized at G1 using  $\alpha$ -factor and then treated with thiolutin or DMSO (mock) for 15 min before shifting to the non-permissive temperature (37°C). At the indicated time points after temperature shift (37°C), cells were collected for analysis of protein levels by Western blot. (B) Inhibition of *rpb1-1* at non-permissive temperature does not affect *spt16* (*G132D*) depletion. The experiments were performed as described above except that different mutants were used with DMSO treatment.

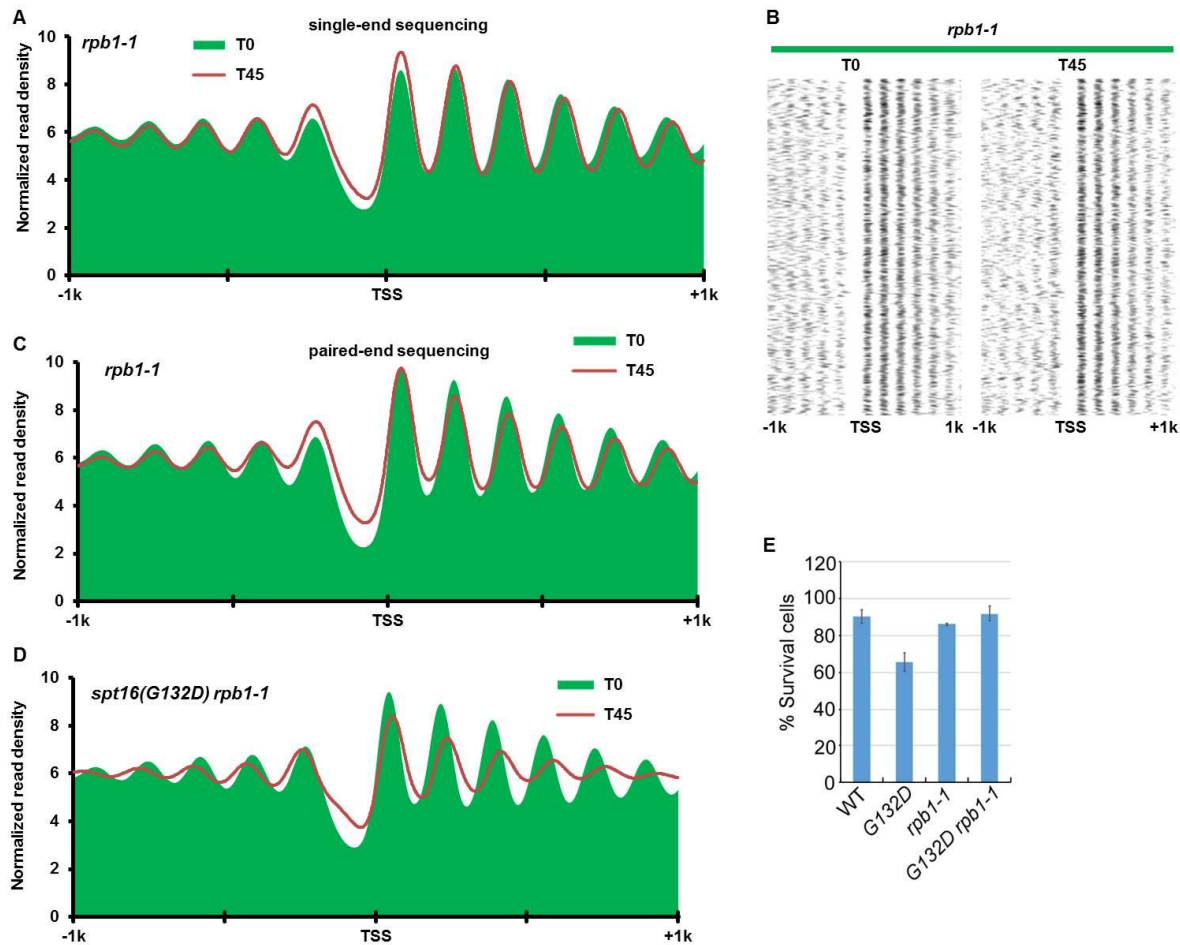

**FIG S3. Nucleosomes in *rpb1-1* cells shifted slightly towards TES at non-permissive temperature.** (A) The average nucleosome occupancy surrounding TSS in *rpb1-1* mutant cells at 37°C for 0 min (T0, green) and for 45 min (T45, red line) was calculated. (B) Heat map of nucleosome occupancy at TSS sites in *rpb1-1* mutant cells. *rpb1-1* mutant cells at permissive temperature 37°C (T0) and 37°C treatment for 45 minutes (red line, T45) were shown. Nucleosome heat map was generated using method described in Fig. S1D-E. (C-D) The average nucleosome organization around the transcription start sites (TSS) in *rpb1-1* (C) and *spt16* (*G132D*) *rpb1-1* (D) mutant

cells based on analysis of Mnase-seq datasets using paired-end sequencing. (E) Inhibition of *rbp1-1* restores the reduced cell viability of *spt16(G132D)* cells at non-permissive temperature. Cells arrested at G1 phase using  $\alpha$  factor 25°C were either treated at 37°C for 45 min or left at 25°C for 45 min. These cells were then diluted and plated onto YPD plates. These plates were incubated at 25°C for 2-3 days. Colonies were counted, and relative viability was calculated by the number of colonies formed from cells treated with 37°C divided by that formed at 25°C . Three plates were used for each sample at each time point for technical repeats. In addition, two biological repeats were performed. The results were from the average and SD from 6 repeats.

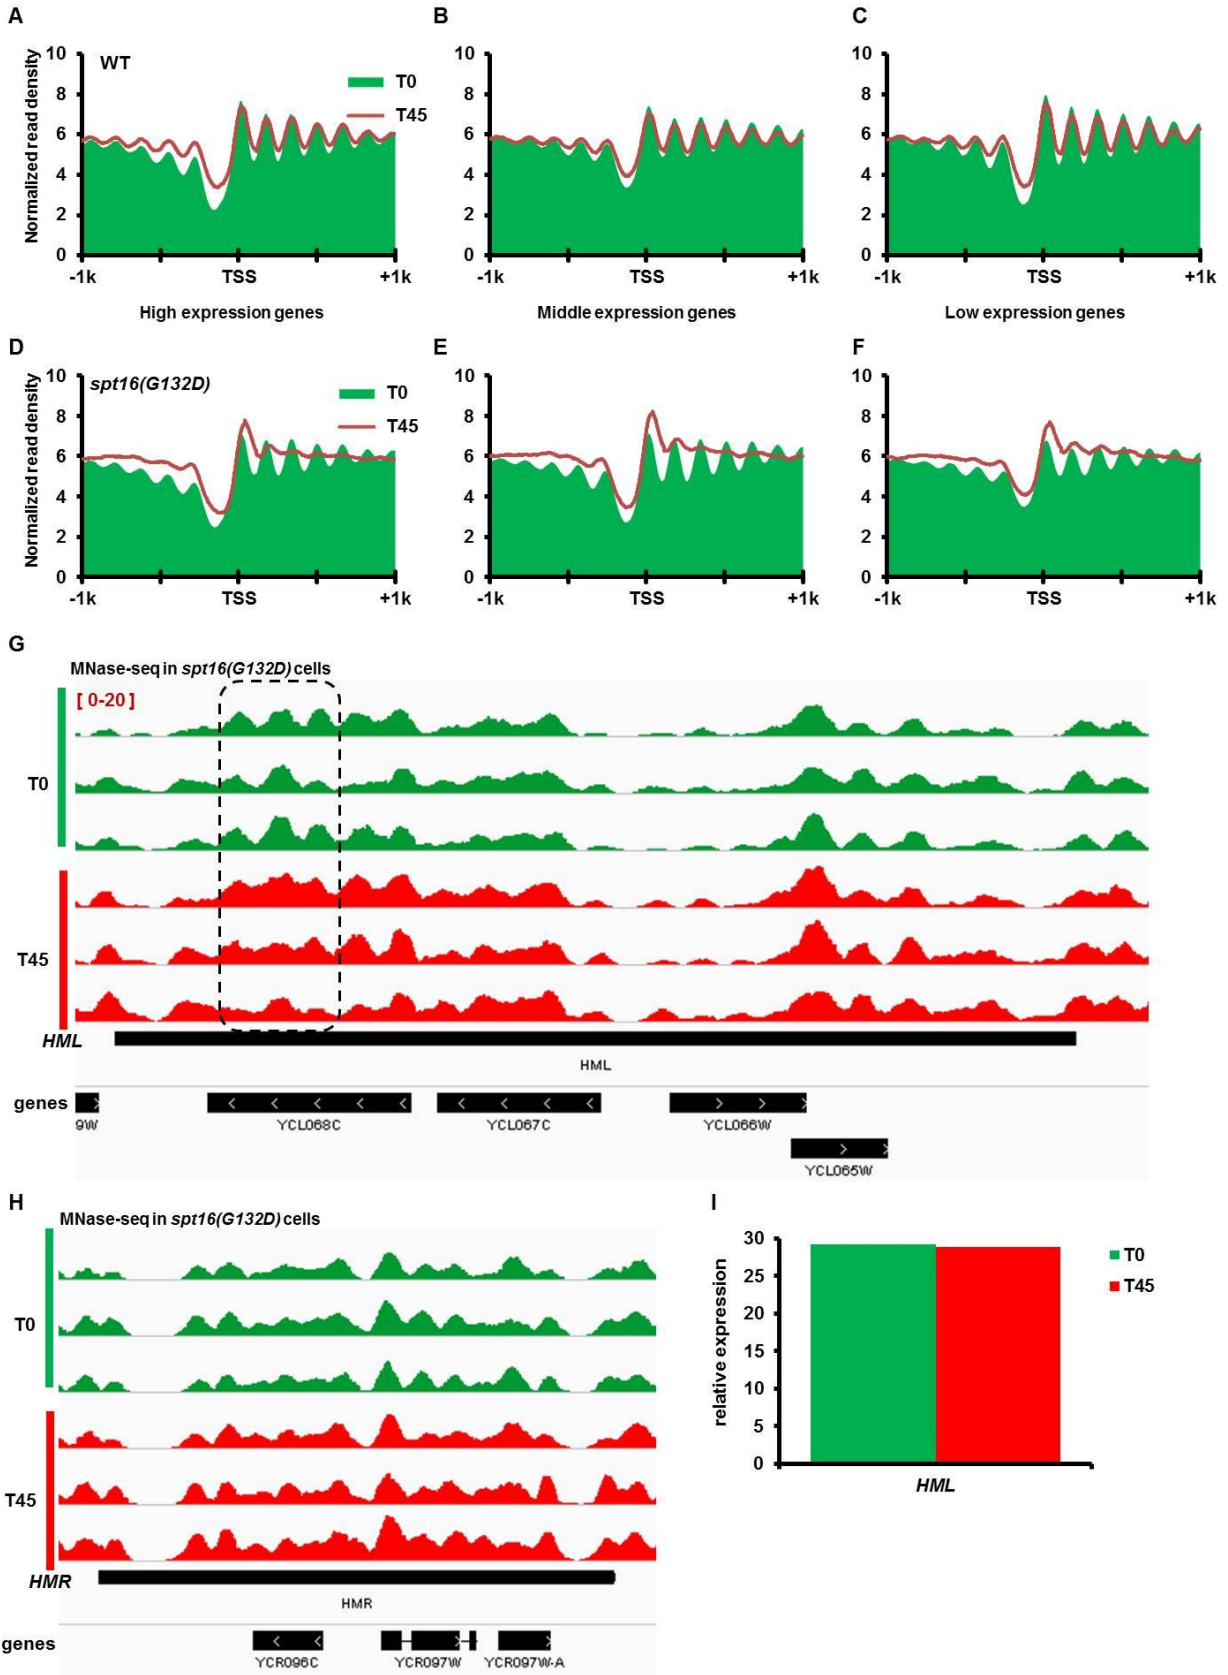

**FIG S4. Nucleosome loss at gene body in *spt16 (G132D)* cells is independent of expression levels of coding genes.** (A-F) The average nucleosome positioning surrounding transcription start site (TSS) of genes with high, middle and low expression for WT cells (A-C) and *spt16 (G132D)* cells (D-F) were calculated using similar procedures described in Fig. 1. The entire yeast genes were divided into three groups based on the reported transcript abundance (2). (G) Nucleosomes at the silent *HML* locus were altered in *spt16 (G132D)* cells at 37°C for 45 min. MNase-seq sequence reads at the *HML* locus from three independent experiments at permissive temperature (T0) and 37°C for 45 min (T45) were shown. The grey box highlights a region with altered nucleosome positions. (H) Nucleosomes at the *HMR* locus were not altered in *spt16 (G132D)* cells at 37°C for 45 min. (I) The expression of the two genes at silent *HML* locus were not altered in *spt16 (G132D)* cells at 37°C for 45 min. RNA-seq reads were used to calculate the relative gene expression of  $\alpha1$  and  $\alpha2$  genes at the *HML* locus at two different temperatures. Since RNA-seq results were obtained using *MATa* strain and we did not calculate the expression of *HMR* locus.

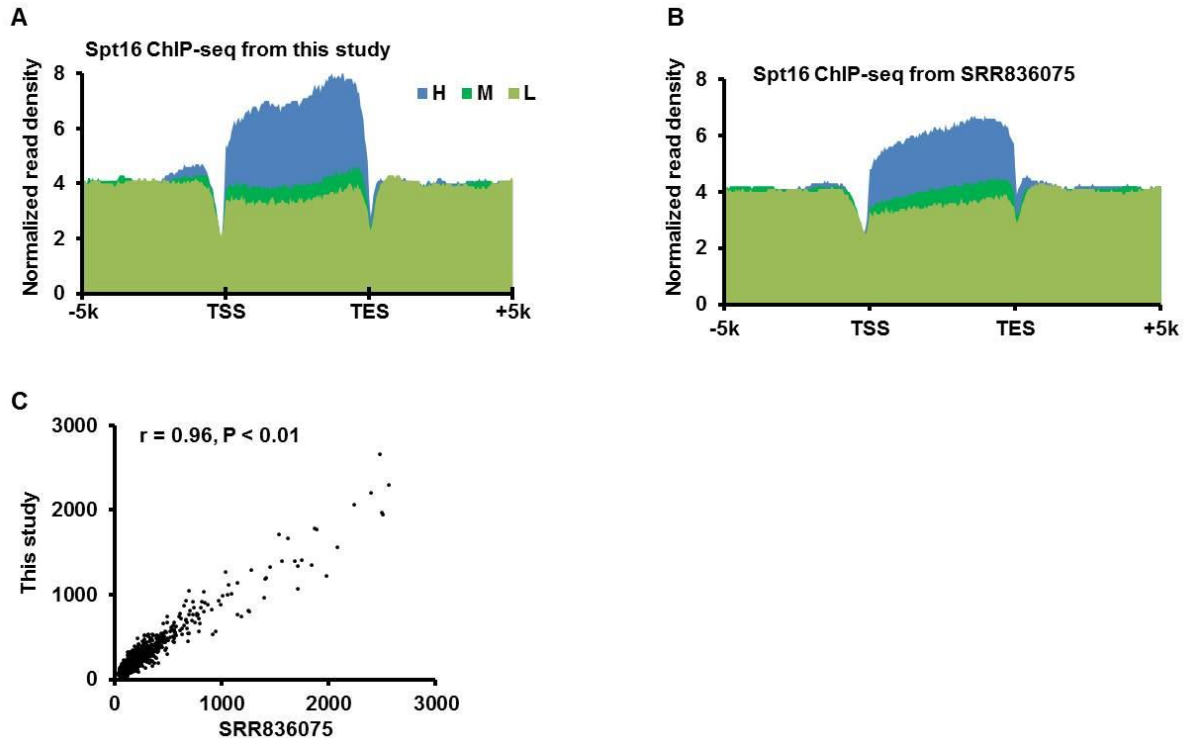

**FIG S5. Spt16 is enriched at highly expressed genes.** The average read density of Spt16 ChIP-seq from this study (A) or public work (3) (B) from 5Kb upstream TSS to 5Kb downstream of TES was calculated. The entire yeast genes were split into three groups according to their expression status described in Fig. 2 and Fig. S1A. H: high, M: middle, and L: low expression. (C) Correlation of Spt16 ChIP-seq result between this study and the public work. The Spt16 peaks were identified by MACS2 and used to perform dot plot, and correlation analysis (Pearson's correlation coefficient) was calculated.



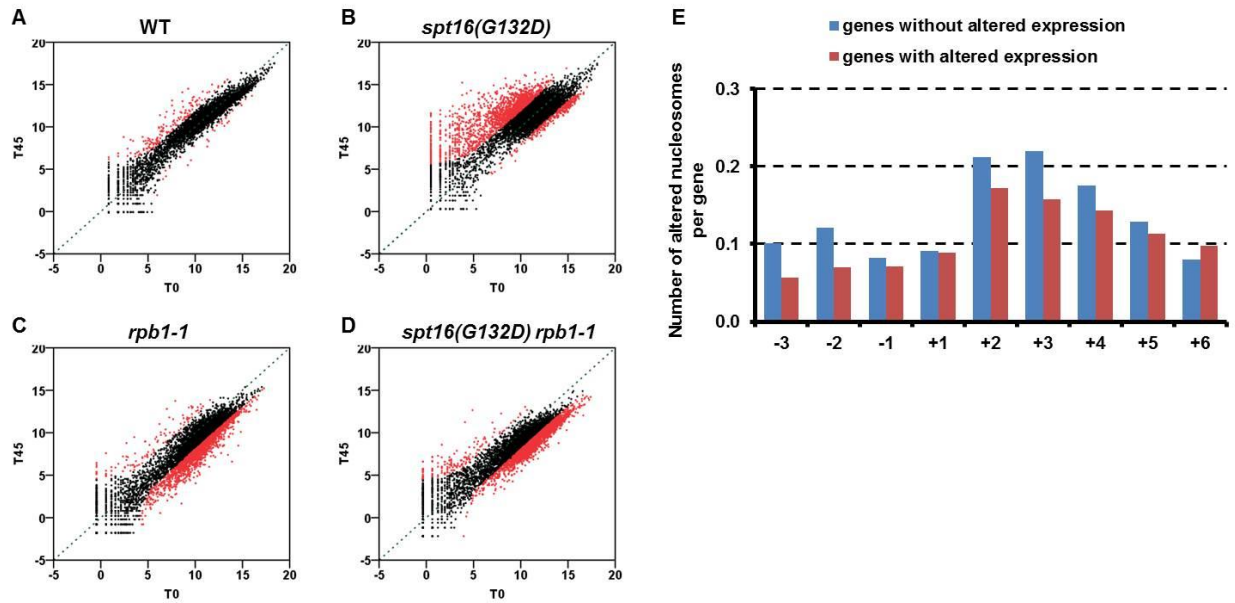

**FIG S6. The transcription of some coding gene is changed upon depletion of Spt16.** (A-D) Effect of inactivation of *spt16* (*G132D*) (B), *rpb1-1* (C) alone or in combination (D) on transcription of coding genes. The dot plot shows the variation of the log<sub>2</sub> ratio of RPKM at 45min (T45) over 0min (T0) of individual ORFs in WT (A), *spt16* (*G132D*) (B), *rpb1-1* (C), and *spt16* (*G132D*) *rpb1-1* (D) mutation cells. Each dot represents one ORF, and the red dots represent ORFs that exhibit a significant change (calculated by DE seq (4)) in gene expression. (E) The nucleosomal changes at genes with changed expression upon Spt16 depletion are similar to those without changed expression. Genes were separated into two groups based on whether their expression was altered in *spt16* (*G132D*) cells shown in (B). The number of altered nucleosomes per gene from -3 to +6 nucleosome positions of each ORF after TSS (X-axis) was calculated (Y-axis).

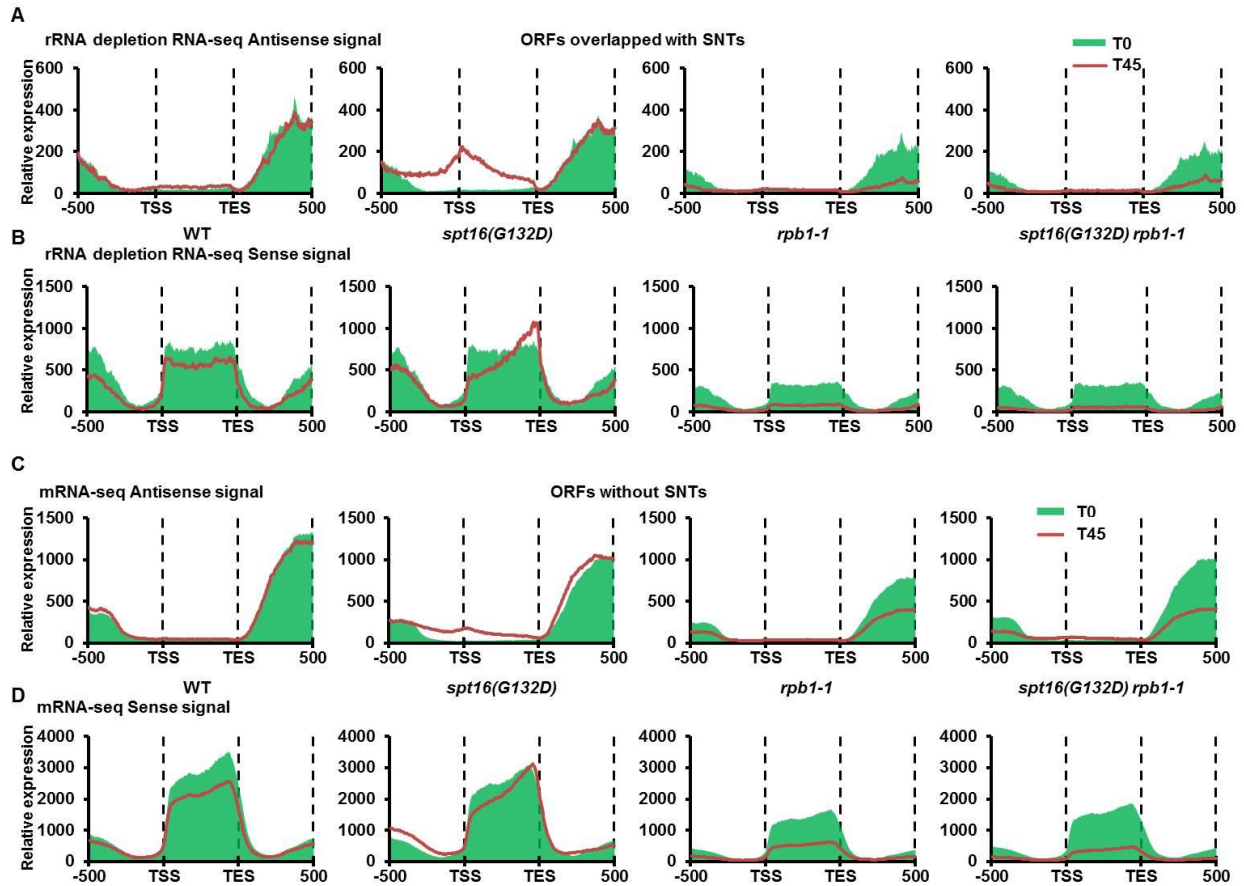

**FIG S7. The transcription status of ORFs overlapped with or without SNTs. (A-B)**

Both antisense (A) and sense (B) non-coding transcripts increase at ORFs overlapped with SNTs in the *spt16* (*G132D*) mutant cells detected RNA-seq using rRNA depletion RNA. (C-D) Neither the antisense nor sense transcripts are altered to a significant degree at ORFs without SNTs upon depletion of Spt16. The antisense (C) and sense (D) RNA-seq reads of ORFs without SNTs calculated using similar procedures described in Fig. 4E-F and were plotted from 500 bp upstream of TSS to 500 bp downstream of TES. WT, *spt16* (*G132D*), *rpb1-1*, and *spt16* (*G132D*) *rpb1-1* mutation cells before and after restrictive temperature treatments were plotted as green areas (T0) and red lines (T45), respectively.

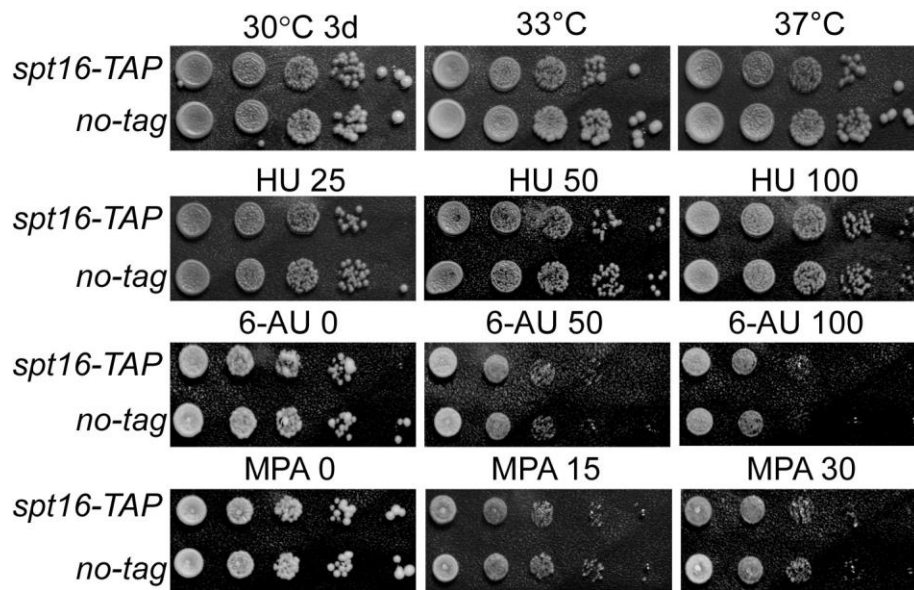

**FIG S8. Spt16-TAP is functional.** Ten-fold serial dilution of WT (no-tag) strain and the strain expressing Spt16-TAP were spotted YPD plates (different temperatures) or with plates containing different concentrations hydroxyurea (HU), 6-Azaauracil (6-AU) and mycophenolic acid (MPA). These plates were then incubated at 30°C for 2-3 days before photography. Number indicates the concentration used for the study: HU (mM); 6-AU and MPA ( $\mu\text{g/ml}$ ).

**Table S1: Correlation of Mnase-seq repeats and RNA-seq repeats**

**A**

| WT T0 MNase-seq |          |          |          |
|-----------------|----------|----------|----------|
|                 | repeat 1 | repeat 2 | repeat 3 |
| repeat 1        | 1        |          |          |
| repeat 2        | 0.82     | 1        |          |
| repeat 3        | 0.81     | 0.83     | 1        |

**B**

| WT T45 MNase-seq |          |          |          |
|------------------|----------|----------|----------|
|                  | repeat 1 | repeat 2 | repeat 3 |
| repeat 1         | 1        |          |          |
| repeat 2         | 0.84     | 1        |          |
| repeat 3         | 0.83     | 0.82     | 1        |

**C**

| spt16(G132D) T0 MNase-seq |          |          |          |
|---------------------------|----------|----------|----------|
|                           | repeat 1 | repeat 2 | repeat 3 |
| repeat 1                  | 1        |          |          |
| repeat 2                  | 0.7      | 1        |          |
| repeat 3                  | 0.9      | 0.8      | 1        |

**D**

| spt16(G132D) T45 MNase-seq |          |          |          |
|----------------------------|----------|----------|----------|
|                            | repeat 1 | repeat 2 | repeat 3 |
| repeat 1                   | 1        |          |          |
| repeat 2                   | 0.9      | 1        |          |
| repeat 3                   | 0.8      | 0.9      | 1        |

**E**

| MNase-seq samples                | Correlation between repeats |
|----------------------------------|-----------------------------|
| spt16(G132D)rpb1-1 T0 MNase-seq  | 0.78                        |
| spt16(G132D)rpb1-1 T45 MNase-seq | 0.75                        |
| rpb1-1 T0 MNase-seq              | 0.77                        |
| rpb1-1 T45 MNase-seq             | 0.78                        |

**F**

| RNA-seq samples                | Correlation between repeats |
|--------------------------------|-----------------------------|
| WT T0 RNA-seq                  | 0.83                        |
| WT T45 RNA-seq                 | 0.98                        |
| spt16(G132D) T0 RNA-seq        | 0.84                        |
| spt16(G132D) T45 RNA-seq       | 0.98                        |
| spt16(G132D)rpb1-1 T0 RNA-seq  | 0.84                        |
| spt16(G132D)rpb1-1 T45 RNA-seq | 0.89                        |
| rpb1-1 T0 RNA-seq              | 0.81                        |
| rpb1-1 T45 RNA-seq             | 0.94                        |

**Table S1: MNase-seq datasets and RNA-seq datasets are reproducible.**

Wild type or *spt16* (*G132D*) mutant cells were arrested at G1 at 25°C. These cells were then shifted to 37°C for 45 min (T45) or kept at 25°C (T0). These cells were harvested and subjected to MNase-seq analysis. Nucleosomes were assigned using the

DNAPOS program and the correlation coefficient was calculated based on individual nucleosomes of each repeat. RNA-seq datasets were generated as described in Methods. To calculate correlation coefficient, the expression levels of all genes were calculated, and the correlation coefficient was calculated based on individual genes of each repeat.

**Table S2. Total number of reads for each MNase-seq, CHIP-seq and RNA-seq****Dataset**

| samples                                   | sequence type | mapped reads |
|-------------------------------------------|---------------|--------------|
| WT T0 MNase-seq repeat 1                  | single-end    | 3913485      |
| WT T0 MNase-seq repeat 2                  | single-end    | 2530134      |
| WT T0 MNase-seq repeat 3                  | single-end    | 2242105      |
| WT T45 MNase-seq repeat 1                 | single-end    | 3718052      |
| WT T45 MNase-seq repeat 2                 | single-end    | 5246466      |
| WT T45 MNase-seq repeat 3                 | single-end    | 2322472      |
| spt16(G132D) T0 MNase-seq repeat 1        | single-end    | 3987060      |
| spt16(G132D) T0 MNase-seq repeat 2        | single-end    | 4660707      |
| spt16(G132D) T0 MNase-seq repeat 3        | single-end    | 3670763      |
| spt16(G132D) T45 MNase-seq repeat 1       | single-end    | 4271105      |
| spt16(G132D) T45 MNase-seq repeat 2       | single-end    | 2893228      |
| spt16(G132D) T45 MNase-seq repeat 3       | single-end    | 3536522      |
| spt16(G132D)rpb1-1 T0 MNase-seq repeat 1  | single-end    | 2550081      |
| spt16(G132D)rpb1-1 T45 MNase-seq repeat 1 | single-end    | 1708887      |
| spt16(G132D)rpb1-1 T0 MNase-seq repeat 2  | paired-end    | 65170084     |
| spt16(G132D)rpb1-1 T45 MNase-seq repeat 2 | paired-end    | 57986470     |
| rpb1-1 T0 MNase-seq repeat 1              | single-end    | 4036586      |
| rpb1-1 T45 MNase-seq repeat 1             | single-end    | 1511415      |
| rpb1-1 T0 MNase-seq repeat 2              | paired-end    | 72724080     |
| rpb1-1 T45 MNase-seq repeat 2             | paired-end    | 36956710     |
| spt16 TAP tagged CHIP-seq                 | single-end    | 2478615      |
| spt16 TAP tagged input                    | single-end    | 2048336      |
| w3031a strain spt16 CHIP-seq              | single-end    | 957777       |
| w3031a strain input                       | single-end    | 1967069      |
| WT T0 RNA-seq repeat 1                    | paired-end    | 19477204     |
| WT T45 RNA-seq repeat 1                   | paired-end    | 28839820     |
| spt16(G132D) T0 RNA-seq repeat 1          | paired-end    | 22351150     |
| spt16(G132D) T45 RNA-seq repeat 1         | paired-end    | 30505422     |
| spt16(G132D)rpb1-1 T0 RNA-seq repeat 1    | paired-end    | 24833956     |
| spt16(G132D)rpb1-1 T45 RNA-seq repeat 1   | paired-end    | 26515136     |
| rpb1-1 T0 RNA-seq repeat 1                | paired-end    | 23144076     |
| rpb1-1 T45 RNA-seq repeat 1               | paired-end    | 25695260     |
| WT T0 RNA-seq repeat 2                    | paired-end    | 10925128     |
| WT T45 RNA-seq repeat 2                   | paired-end    | 31620950     |
| spt16(G132D) T0 RNA-seq repeat 2          | paired-end    | 10034698     |
| spt16(G132D) T45 RNA-seq repeat 2         | paired-end    | 33932212     |
| spt16(G132D)rpb1-1 T0 RNA-seq repeat 2    | paired-end    | 10299394     |
| spt16(G132D)rpb1-1 T45 RNA-seq repeat 2   | paired-end    | 22485392     |
| rpb1-1 T0 RNA-seq repeat 2                | paired-end    | 10261482     |
| rpb1-1 T45 RNA-seq repeat 2               | paired-end    | 20448794     |

**Table S3: Yeast strains used in this study (Isogenic with W303)**

| Name    | Genetic background                                                                         | Reference  |
|---------|--------------------------------------------------------------------------------------------|------------|
| W3031A  | <i>MATa leu2-3, 112 ura3-1 his3-11, 15, trp1-1, ade2-1, can1-100</i>                       | (5)        |
| ZGY1059 | <i>MATa leu2-3, 112 ura3-1 his3-11, 15, trp1-1, ade2-1, can1-100, spt16-TAP::TRP</i>       | (6)        |
| ZGY1445 | <i>MATa leu2-3, 112 ura3-1 his3-11, 15, trp1-1, ade2-1, can1-100, spt16 (G132D)</i>        | This study |
| RS420   | <i>MATa ura3-52, rpb1-1</i>                                                                | (7)        |
| LQY46   | <i>MATa leu2-3, 112 ura3-1 his3-11, 15, trp1-1, ade2-1, can1-100, rpb1-1</i>               | This study |
| LQY48   | <i>MATa leu2-3, 112 ura3-1 his3-11, 15, trp1-1, ade2-1, can1-100, rpb1-1 spt16 (G132D)</i> | This study |

All yeast strains are in W303 background. Both *spt16 (G132D)* and *rpb1-1* strains were cross with W303 background for more than 4 times before used for the experiments in this study.

## Supplemental Methods

### Temperature survival assay

To determine the viability of yeast cells in response to the challenge of high temperature treatment, cells were grown in YPD media to log phase, and then arrested in G1 phase using  $\alpha$  factor. Equal amounts of yeast cells were subjected to either treatment at 37°C or at 25°C for 45 min. These cells were then diluted and plated onto YPD plates to allow for growing at 25°C for 2-3 days. Colonies were counted, and relative viability was

calculated by the number of colonies formed using cells treated with 37°C divided by that formed without treatment.

### **Yeast spot assay**

To determine whether Spt16-TAP is functional, wild type and *spt16-TAP* strains were challenged using temperature, the agents that affect DNA replication (hydroxyurea (HU)) and transcription (6-Azauracil (6-AU) and mycophenolic acid (MPA)). To assay temperature sensitivity, 10-fold serial dilutions of fresh yeast cells were spotted onto non-selective YPD media and incubated at the indicated temperature to assay cell viability. To assay the sensitivity for HU, 10-fold serial dilutions of yeast cells were spotted onto YPD plates containing different concentrations of HU (mM). Plates were incubated at 30°C for at least two days before being photographed using a digital camera (Nikon). To assay 6-AU and MPA sensitivity, wild type and all mutant strains were transformed with pRS316 and grew on SCM-Ura synthetic drop-out plates prior to the test. 10- fold serial dilution of each strain was plated onto SCM-Uracil synthetic drop-out plates containing indicated concentration of different drugs (6-AU dissolved in 1M NH<sub>4</sub>OH(μg/ml) and MPA dissolved in DMSO (μg/ml)), and was allowed to grow 2-5 days at 25°C before photographs. The experiments were repeated twice and results from a representative single drug concentration were shown.

### **Supplemental References:**

1. **Yu C, Gan H, Han J, Zhou ZX, Jia S, Chabes A, Farrugia G, Ordog T, Zhang Z.** 2014. Strand-Specific Analysis Shows Protein Binding at Replication Forks and PCNA Unloading from Lagging Strands when Forks Stall. *Mol Cell* **56**:551-563.



2. **David L, Huber W, Granovskaia M, Toedling J, Palm CJ, Bofkin L, Jones T, Davis RW, Steinmetz LM.** 2006. A high-resolution map of transcription in the yeast genome. *Proceedings of the National Academy of Sciences of the United States of America* **103**:5320-5325.
3. **Foltman M, Evrin C, De Piccoli G, Jones RC, Edmondson RD, Katou Y, Nakato R, Shirahige K, Labib K.** 2013. Eukaryotic replisome components cooperate to process histones during chromosome replication. *Cell Rep* **3**:892-904.
4. **Anders S, Huber W.** 2010. Differential expression analysis for sequence count data. *Genome Biol* **11**:R106.
5. **Thomas BJ, Rothstein R.** 1989. Elevated recombination rates in transcriptionally active DNA. *Cell* **56**:619-630.
6. **Han J, Li Q, McCullough L, Kettelkamp C, Formosa T, Zhang Z.** 2010. Ubiquitylation of FACT by the Cullin-E3 ligase Rtt101 connects FACT to DNA replication. *Genes & Development* **24**:1485-1490.
7. **Nonet M, Scafe C, Sexton J, Young R.** 1987. Eucaryotic RNA polymerase conditional mutant that rapidly ceases mRNA synthesis. *Molecular and Cellular Biology* **7**:1602-1611.
